# Supplementary material for: Bacteriophage therapy for the treatment of Mycobacterium tuberculosis infections in humanized mice
Source: PubMed Central journal article supplement (PMC10924958; doi:10.1038/s42003-024-06006-x), 2024-03-09
Supplement: 42003_2024_6006_MOESM3_ESM.pdf [file 42003_2024_6006_MOESM3_ESM.pdf]

## **Description of Additional Supplementary Files**

**File name:** Supplementary Data 1

**Description:** The source data behind the graphs in the paper.
